# Supplementary material for: Single-Cell Transcriptome of Wet AMD Patient-Derived Endothelial Cells in Angiogenic Sprouting
Source: MDPI journal article supplement (doi:10.3390/ijms232012549), 2022-10-19
Supplement: s1 [file s1]

### Supplemental Figure S1

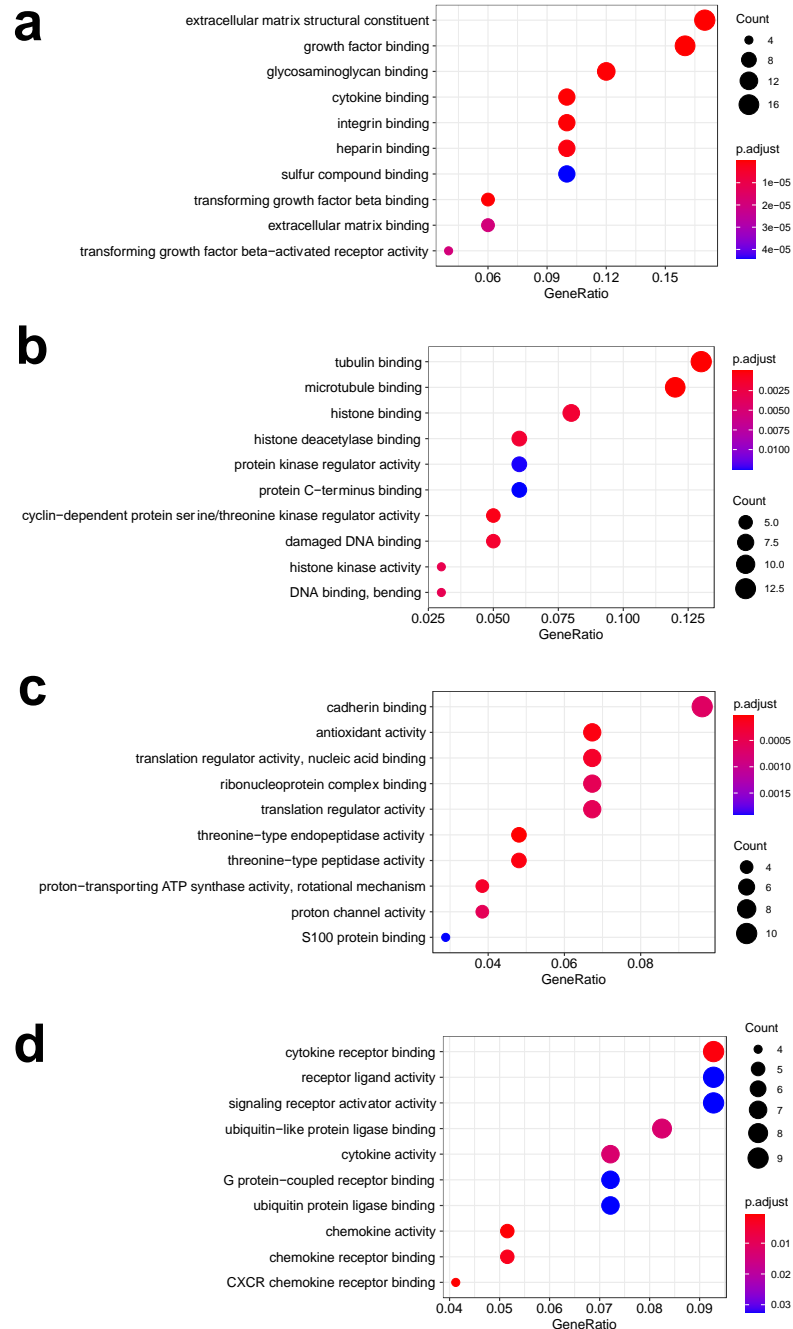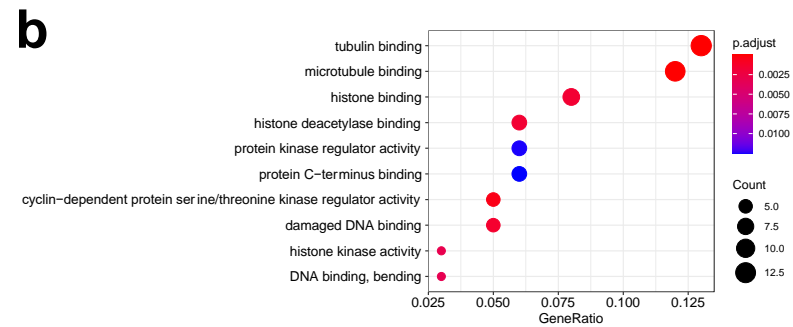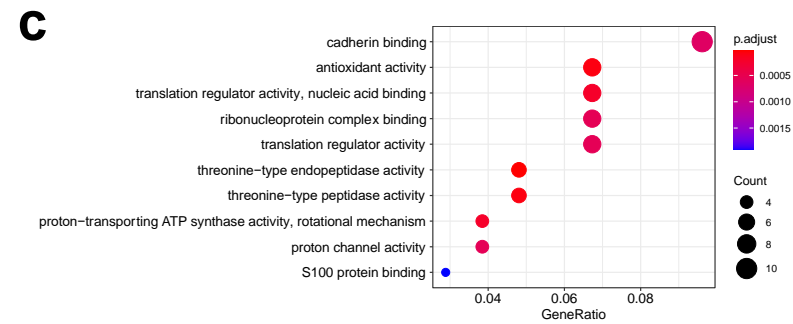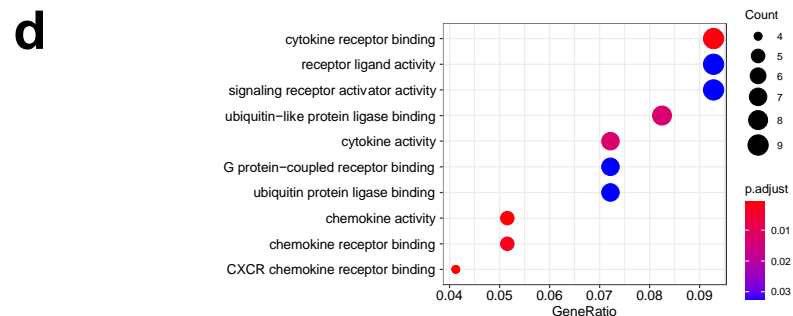

**Supplemental Figure S1: Gene ontology molecular function analysis of cluster markers for each BOEC subpopulation. (a)** ‘Vascular remodeling’ population; **(b)** ‘Proliferative’ population; **(c)** ‘Energetically primed’ population; **(d)** ‘Activated’ population. The top 10 enriched processes based on adjusted p values (p.adjust) are shown, with ‘count’ indicating the number of genes underlying each term.

**Supplemental Table S1: Demographics of wet AMD and normal donors from whom blood outgrowth endothelial cells (BOECs) were derived.**

| Disease status | Age | Genotypes                                     |                                               |                                           |
|----------------|-----|-----------------------------------------------|-----------------------------------------------|-------------------------------------------|
|                |     | ARMS2, rs10490924<br>(risk allele: <b>T</b> ) | HTRA1, rs11200638<br>(risk allele: <b>A</b> ) | CFH, rs800292<br>(risk allele: <b>G</b> ) |
| Wet AMD        | 71  | <b>TT</b>                                     | <b>AA</b>                                     | <b>GA</b>                                 |
|                | 86  | <b>TT</b>                                     | <b>AA</b>                                     | AA                                        |
| Normal control | 46  | GG                                            | GG                                            | <b>GA</b>                                 |

**Additional Table S2: Key resources used in this study.**

| REAGENT or RESOURCE                                  | SOURCE                                  | IDENTIFIER                                                                                                                                                          |
|------------------------------------------------------|-----------------------------------------|---------------------------------------------------------------------------------------------------------------------------------------------------------------------|
| <b>Biological samples</b>                            |                                         |                                                                                                                                                                     |
| PBMC                                                 | This paper                              | N/A                                                                                                                                                                 |
| <b>Chemicals, peptides, and recombinant proteins</b> |                                         |                                                                                                                                                                     |
| TRITC-Phalloidin                                     | Merck                                   | 90228                                                                                                                                                               |
| <b>Critical commercial assays</b>                    |                                         |                                                                                                                                                                     |
| Chromium Single Cell 3' v3 Reagent Kit               | 10X Genomics                            | PN-1000075                                                                                                                                                          |
| <b>Experimental models: Cell lines</b>               |                                         |                                                                                                                                                                     |
| Patient-derived BOECs                                | This paper                              | N/A                                                                                                                                                                 |
| <b>Software and algorithms</b>                       |                                         |                                                                                                                                                                     |
| Seurat v 4.1.1                                       | References 91 and 92 in Main Manuscript | <a href="https://satijalab.org/seurat/">https://satijalab.org/seurat/</a>                                                                                           |
| clusterProfiler v 4.2.2                              | Reference 96 in Main Manuscript         | <a href="https://github.com/YuLab-SMU/clusterProfiler">https://github.com/YuLab-SMU/clusterProfiler</a>                                                             |
| ReactomePA v 1.38.0                                  | Reference 97 in Main Manuscript         | <a href="https://github.com/YuLab-SMU/ReactomePA">https://github.com/YuLab-SMU/ReactomePA</a>                                                                       |
| ZEN BLUE                                             | ZEISS                                   | <a href="https://www.zeiss.com/microscopy/int/products/microscope-software/zen.html">https://www.zeiss.com/microscopy/int/products/microscope-software/zen.html</a> |
| <b>Others</b>                                        |                                         |                                                                                                                                                                     |
| Confocal Airyscan Microscope LSM800                  | ZEISS                                   | N/A                                                                                                                                                                 |
